# Supplementary material
Source: PubMed Central journal article supplement (PMC10811745)
Supplement: NIHMS1922025-supplement-3.pdf [file NIHMS1922025-supplement-3.pdf]

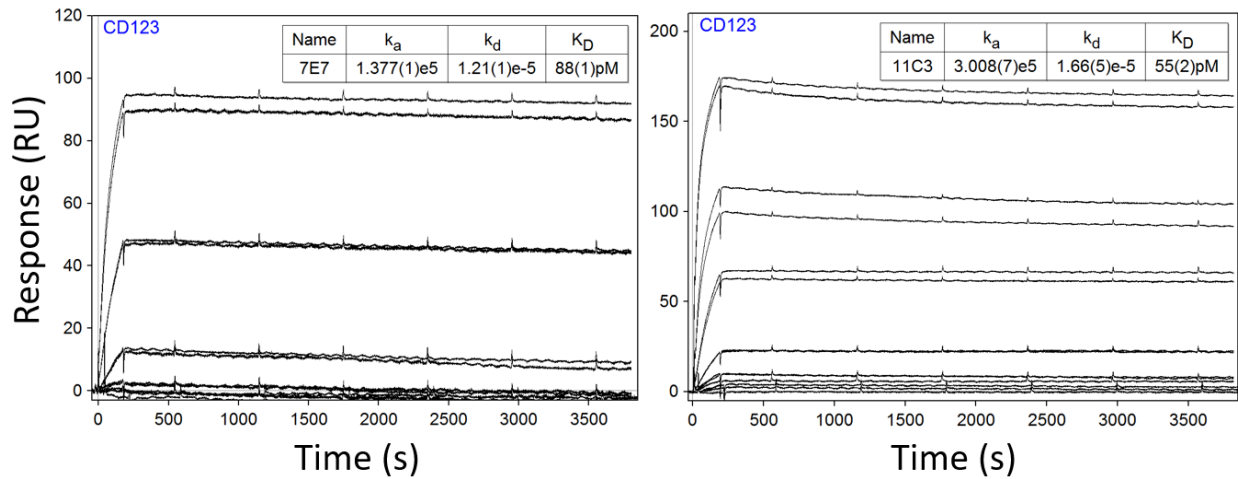

**Supplemental Figure S2. Binding affinity assessment of the anti-CD123 mAbs to recombinant human CD123.** Shown are the surface plasmon resonance (SPR) sensorgrams of (A) 7E7 and (B) 11C3. Purified mAbs were injected over an SPR chip immobilized with recombinant human CD123 for 5 minutes, followed by a dissociation phase for 1 hour. Binding sensorgrams were corrected for nonspecific binding by subtraction of the blank flow cell control and fitted within the Scrubber2 software package (BioLogic Software, Campbell, Australia) to obtain the binding rate constants. Estimated dissociation constant  $K_D$  of 7E7 and 11C3 mAbs to CD123 are 88 pM and 55 pM, respectively.
