# Supplementary material
Source: PubMed Central journal article supplement (PMC10811745)
Supplement: NIHMS1922025-supplement-6.pdf [file NIHMS1922025-supplement-6.pdf]

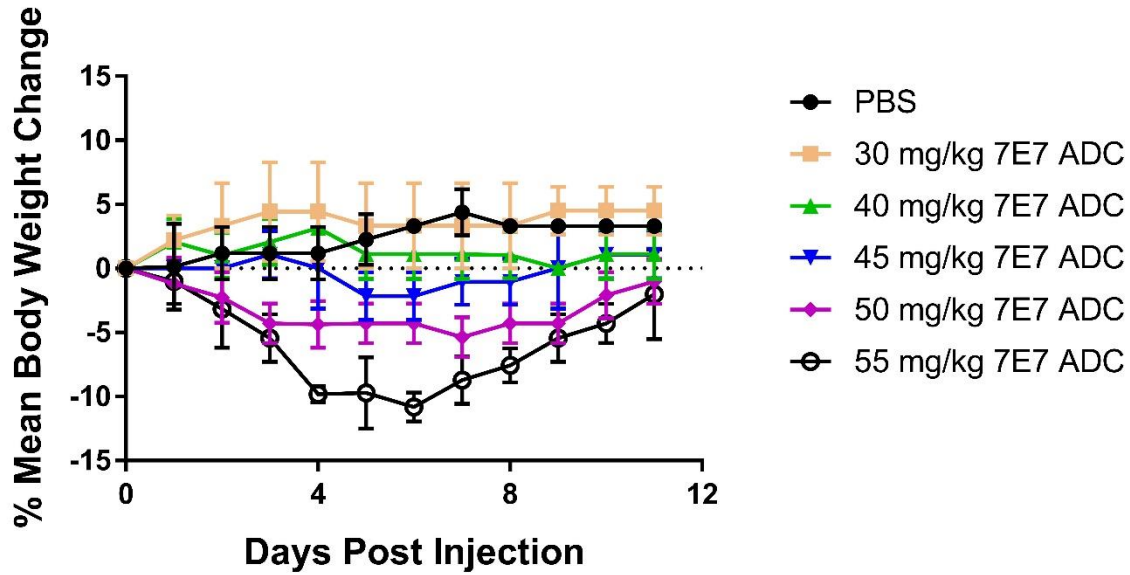

**Supplemental Figure S5. *In vivo* tolerability study of the ADCs in healthy animals.** Healthy Swiss-Webster mice were injected with single intravenous doses of 7E7-DM4 ADC ranging from 30 to 55 mg/kg. Percent body weight was calculated with respect to the body weight on the day prior to treatment. Symbols and error bars represent the mean and the standard deviations of the percent body weight (n = 5 per dose). 7E7-DM4 ADC was well tolerated at doses up to 45 mg/kg with minimal change in body weight. The mice experienced more substantial toxicity at higher doses, with the %nadir weight loss observed at 55mg/kg dose being  $10.8 \pm 1.14\%$ .
