# Supplementary material
Source: PubMed Central journal article supplement (PMC10811745)
Supplement: NIHMS1922025-supplement-7.pdf [file NIHMS1922025-supplement-7.pdf]

**Supplemental Table S1: Model parameters**

| Parameter                                     | Abbreviation         | Value (%CV)    | Units                             | Source        |
|-----------------------------------------------|----------------------|----------------|-----------------------------------|---------------|
| Anetumab ravtansine clearance                 | CL <sub>ADC</sub>    | 5.6E-04 (3.2%) | L/hr*kg                           | Model Fitting |
| Anetumab ravtansine distribution clearance    | CLD <sub>ADC</sub>   | 8.7E-04 (20%)  | L/hr*kg                           | Model Fitting |
| Anetumab ravtansine central volume            | V1 <sub>ADC</sub>    | 5.3E-02 (3.9%) | L/kg                              | Model Fitting |
| Anetumab ravtansine peripheral volume         | V2 <sub>ADC</sub>    | 5.4E-02 (11%)  | L/kg                              | Model Fitting |
| Human glomerulus filtration rate              | GFR                  | 1.1E-01        | L/hr*kg                           | [1]           |
| DM4 volume of distribution                    | V <sub>DM4</sub>     | 3.6E-01 (11%)  | L/kg                              | Model Fitting |
| DM4 metabolism clearance                      | CL <sub>met</sub>    | 2.3E-01 (13%)  | L/hr*kg                           | Model Fitting |
| S-Methyl-DM4 clearance                        | CL <sub>SMeDM4</sub> | 4.2E-02 (13%)  | L/hr*kg                           | Model Fitting |
| Association rate constant sdAb:DM4            | k <sub>on</sub>      | 0.68           | nM <sup>-1</sup> hr <sup>-1</sup> | In-vitro      |
| Dissociation rate constant sdAb:DM4           | k <sub>off</sub>     | 2.6            | hr <sup>-1</sup>                  | In-vitro      |
| Drug-to-antibody ratio                        | DAR                  | 3.2            | None                              | [2]           |
| Anti-maytansinoid sdAb central volume         | V1 <sub>sdAb</sub>   | 4.1E-2         | L/kg                              | [1]           |
| Anti-maytansinoid sdAb peripheral volume      | V2 <sub>sdAb</sub>   | 9.2E-2         | L/kg                              | [1]           |
| Anti-maytansinoid sdAb distribution clearance | CLD <sub>sdAb</sub>  | 5.5E-2         | L/h*kg                            | [1]           |

1. Hoefman S, Ottevaere I, Baumeister J and Sargentini-Maier ML (2015) Pre-Clinical Intravenous Serum Pharmacokinetics of Albumin Binding and Non-Half-Life Extended Nanobodies®. *Antibodies* 4:141-156.
2. Golfier S, Kopitz C, Kahnert A, Heisler I, Schatz CA, Stelte-Ludwig B, Mayer-Bartschmid A, Unterschemmann K, Bruder S, Linden L, Harrenga A, Hauff P, Scholle F-D, Müller-Tiemann B, Kreft B and Ziegelbauer K (2014) Anetumab Ravtansine: A Novel Mesothelin-Targeting Antibody–Drug Conjugate Cures Tumors with Heterogeneous Target Expression Favored by Bystander Effect. *Molecular Cancer Therapeutics* 13:1537-1548. doi: 10.1158/1535-7163.mct-13-0926
