# Supplementary material
Source: PubMed Central journal article supplement (PMC10811745)
Supplement: NIHMS1922025-supplement-8.pdf [file NIHMS1922025-supplement-8.pdf]

| Cell line | CD123 Copy Number | 7E7 ADC IC50 (nM) | 11C3 ADC IC50 (nM) | 8C2 ADC IC50 (nM) |
|-----------|-------------------|-------------------|--------------------|-------------------|
| MOLM-14   | 30,000            | 2.4 ± 0.12        | 1.4 ± 0.069        | 37 ± 2.9          |
| KG-1      | 9,400             | 8.8 ± 1.0         | 6.6 ± 0.68         | 40 ± 5.1          |
| Kasumi-3  | 2,000             | 11 ± 1.0          | 5.3 ± 0.81         | 37 ± 2.7          |
| MV-4-11   | 26,100            | 2.6 ± 0.15        | 1.6 ± 0.11         | 32 ± 2.4          |
| Namalwa   | 0                 | 37 ± 3.0          | 37 ± 2.7           | 33 ± 3.0          |

**Supplemental Table S2. CD123 expression level and *in vitro* cytotoxicity of anti-CD123 DM4-ADCs in AML cell lines.** Table includes CD123 expression level, cytotoxic IC50 and standard error of triplicate samples. The data on CD123 copy number of different tested cell lines were taken from Li et al [1].

1. Li F, Sutherland MK, Yu C, Walter RB, Westendorf L, Valliere-Douglass J, Pan L, Cronkite A, Sussman D, Klussman K, Ulrich M, Anderson ME, Stone IJ, Zeng W, Jonas M, Lewis TS, Goswami M, Wang SA, Senter PD, Law C-L, Feldman EJ and Benjamin DR (2018) Characterization of SGN-CD123A, A Potent CD123-Directed Antibody–Drug Conjugate for Acute Myeloid Leukemia. *Molecular Cancer Therapeutics* 17:554. doi: 10.1158/1535-7163.MCT-17-0742
