# Supplementary material
Source: PubMed Central journal article supplement (PMC10811745)
Supplement: NIHMS1922025-supplement-9.pdf [file NIHMS1922025-supplement-9.pdf]

| Clone Identity | Cytotoxicity in SK-BR-3 Cell Line |                         |              | Competitive ELISA |
|----------------|-----------------------------------|-------------------------|--------------|-------------------|
|                | Free DM4 IC50 (nM)                | DM4 IC50 with sdAb (nM) | Fold shifted | Estimated KD (nM) |
| <b>DMOH9</b>   | 0.2902                            | 60.8                    | 209          | <b>19.9</b>       |
| <b>DMOF8</b>   | 0.4196                            | 43.7                    | 104          | <b>26.2</b>       |
| <b>DMFH2</b>   |                                   | 62.7                    | 149          | <b>25.2</b>       |
| <b>DMFH1</b>   | 0.3953                            | 99.0                    | 250          | <b>10.5</b>       |
| <b>DMFF2</b>   |                                   | 37.0                    | 93.6         | <b>56.6</b>       |
| <b>DMFB8</b>   | 0.3988                            | 55.9                    | 140.2        | <b>ND.</b>        |

**Supplemental Table S3. Summarized results of characterized anti-DM4 sdAbs.**
